# Supplementary material for: A biphasic accelerated strand exchange amplification strategy for culture-independent and rapid detection of Salmonella enterica in food samples
Source: Royal Society of Chemistry journal article supplement (doi:10.1039/d4ay00613e), 2024-01-01
Supplement: d4ay00613e1.pdf [file d4ay00613e1.pdf]

## SUPPLEMENTARY MATERIAL

### **A biphasic accelerated strand exchange amplification strategy for culture-independent and rapid detection of *Salmonella enterica* in food samples**

Xiaojun Zhang<sup>‡a</sup>, Xiujuan Wang<sup>‡a</sup>, Binghui Shi<sup>a</sup>, Junfeng Li<sup>a</sup>, Yaofang Fan<sup>a</sup>, Yong Li<sup>a</sup>,  
Chao Shi<sup>b</sup>, Cuiping Ma<sup>a,\*</sup>

<sup>a</sup> *Shandong Provincial Key Laboratory of Biochemical Engineering, Qingdao Nucleic Acid Rapid Detection Engineering Research Center, College of Marine Science and Biological Engineering, Qingdao University of Science and Technology, Qingdao, 266042, PR China.*

<sup>b</sup> *Qingdao Nucleic Acid Rapid Testing International Science and Technology Cooperation Base, College of Life Sciences, Department of Pathogenic Biology, School of Basic Medicine, and Department of Clinical Laboratory, The Affiliated Hospital of Qingdao University, Qingdao University, Qingdao, 266071, PR China.*

<sup>‡</sup> These authors contributed equally to this work.

\* Corresponding author. College of Marine Science and Biological Engineering, Qingdao University of Science and Technology, Qingdao, 266042, PR China.

Email address: mcp169@163.com

**Table S1** Sequences information used in this work

| Method                     | Name                                                                                                          | Sequence (5'-3')                  |
|----------------------------|---------------------------------------------------------------------------------------------------------------|-----------------------------------|
| ASEA                       | <i>Salmonella enterica</i> strain <i>fimY</i> gene<br>( <sup>a</sup> CP051213.1 <sup>b</sup> 3426259-3426297) | <u>CGCTTAACCAGCTACGCGGCTCAGTT</u> |
|                            |                                                                                                               | <b>GGCAACAAAGC</b>                |
|                            |                                                                                                               | CGCTTAACCAGCTACGCG                |
|                            | R1                                                                                                            | GCTTTGTTGCCAACTGAGC               |
| <sup>c</sup> Real-time PCR | F2                                                                                                            | TCGCACCGTCAAAGGAACCGTAAAGC        |
|                            | R2                                                                                                            | GCATTATCGATCAGTACCAGCCGTCT        |

<sup>a</sup> GenBank accession number. <sup>b</sup> The position of the specific sequence in the *fimY* gene. The underlined portion is the same sequence as that of primer F1. The sequence complementary to primer R1 is shown in bold. <sup>c</sup> The primers of real-time PCR were designed according to Chinese national standard (GB/T 28642-2012).

**Table S2** The performance of the biphasic ASEA method compared with other bacteria detection methods

| Detection method                                               | Detection limit (CFU/mL)                | Assay time (min) | Reference |
|----------------------------------------------------------------|-----------------------------------------|------------------|-----------|
| DNA aptamer-enzyme-linked colorimetric method                  | $< 10^3$                                | 30-40            | 1         |
| LAMP-lateral flow dipstick                                     | $3 \times 10^2$                         | 90               | 2         |
| Biacore surface plasmon resonance (SPR)-based biosensor method | 23                                      | $< 60$           | 3         |
| Immunosensing method                                           | 10                                      | 30               | 4         |
| Photosensitization colorimetric method                         | 13 ( <i>Salmonella</i> in pure culture) | 65               | 5         |
| Fluorescent lateral flow immunoassay method                    | 50 cells/mL                             | 15               | 6         |
| Biphasic ASEA method                                           | 50 ( <i>Salmonella</i> in milk sample)  | 50               | This work |

**Table S3** Biphasic ASEA and gold standard culture-based methods for detection of *S. enterica* in 82 food samples

| Kind of samples* | Samples number* | Detection results          |                          |
|------------------|-----------------|----------------------------|--------------------------|
|                  |                 | Biphasic ASEA (this study) | Culture-based method     |
| Milk             | 1-9             | <input type="checkbox"/>   | <input type="checkbox"/> |
|                  | 10-14           | <input type="checkbox"/>   | <input type="checkbox"/> |
|                  | 15-19           | <input type="checkbox"/>   | <input type="checkbox"/> |
| Scallop          | 20-23           | <input type="checkbox"/>   | <input type="checkbox"/> |
|                  | 24-30           | <input type="checkbox"/>   | <input type="checkbox"/> |
|                  | 31              | <input type="checkbox"/>   | <input type="checkbox"/> |
|                  | 32-36           | <input type="checkbox"/>   | <input type="checkbox"/> |
| Oyster           | 37-39           | <input type="checkbox"/>   | <input type="checkbox"/> |
|                  | 40              | <input type="checkbox"/>   | <input type="checkbox"/> |
|                  | 41-43           | <input type="checkbox"/>   | <input type="checkbox"/> |
|                  | 44-47           | <input type="checkbox"/>   | <input type="checkbox"/> |
| Duck             | 48              | <input type="checkbox"/>   | <input type="checkbox"/> |
|                  | 49-55           | <input type="checkbox"/>   | <input type="checkbox"/> |
|                  | 56-58           | <input type="checkbox"/>   | <input type="checkbox"/> |
|                  | 59-61           | <input type="checkbox"/>   | <input type="checkbox"/> |
| Lettuce          | 62-66           | <input type="checkbox"/>   | <input type="checkbox"/> |
|                  | 67              | <input type="checkbox"/>   | <input type="checkbox"/> |
|                  | 68              | <input type="checkbox"/>   | <input type="checkbox"/> |
| Cucumber         | 69-70           | <input type="checkbox"/>   | <input type="checkbox"/> |
|                  | 71-77           | <input type="checkbox"/>   | <input type="checkbox"/> |
|                  | 78              | -                          | <input type="checkbox"/> |
|                  | 79-82           | <input type="checkbox"/>   | <input type="checkbox"/> |

\*The 82 samples included 19 of milk, 12 of scallop, 12 of oyster, 15 of duck, 10 of lettuce, and 14 of cucumber.

represented that *S. enterica* was detected as positive;  represented that *S. enterica* was detected as negative.

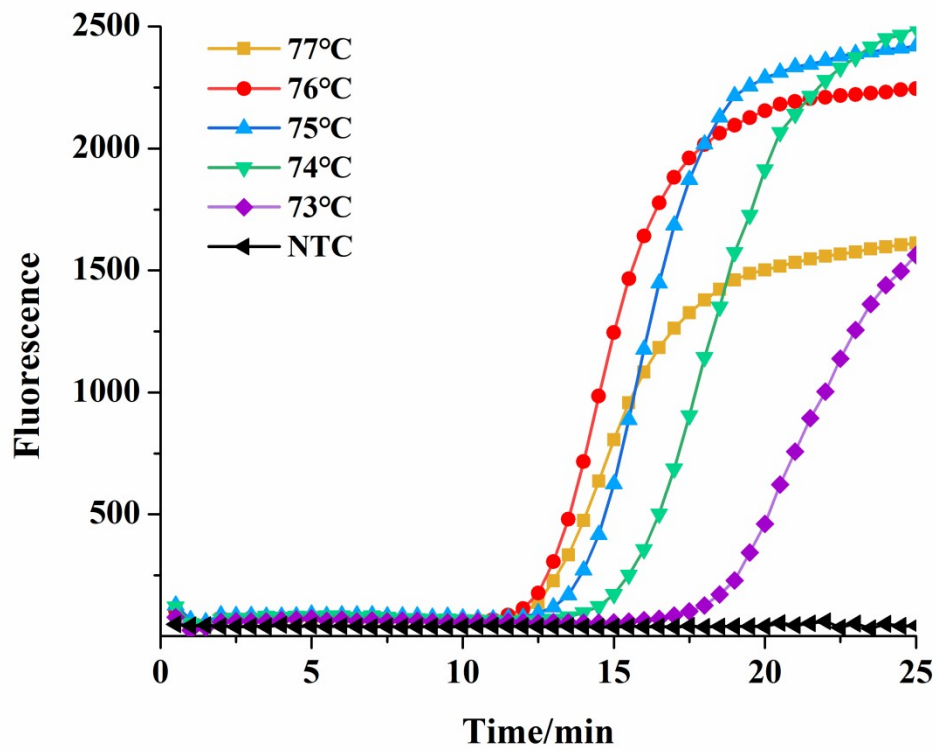

**Fig. S1** Real-time fluorescence curves of biphasic ASEA reaction with serial initial Td values from 73 to 77°C. Non-targeted control (NTC) was conducted with DNase-free water as the target.

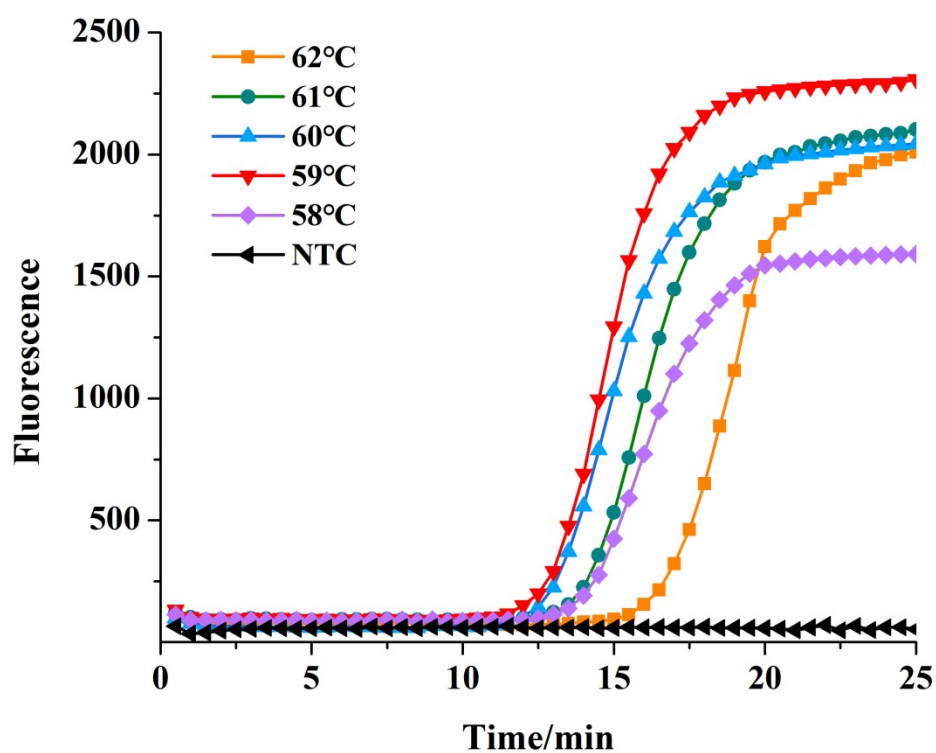

**Fig. S2** Real-time fluorescence curves of biphasic ASEA reaction with serial  $T_r$  values from 58 to 62°C. NTC was conducted with DNase-free water as the target.

## References

1. J. G. Bruno, *Journal of Microbiological Methods*, 2022, **193**, 106406.
2. W. Nuchchanart, P. Pikoolkhao, C. Saengthongpinit, *Animal Bioscience*, 2023, **36**, 654-670.
3. J. W. W. C. D. J. Irudayaraj, *Journal of Food Process Engineering*, 2006, **29**, 373-385.
4. Y. You, S. Lim, J. Hahn, Y. J. Choi and S. Gunasekaran, *Biosensors and Bioelectronics*, 2018, **100**, 389-395.
5. H. Wang, Q. Yang, H. Xu, Y. Zhang, X. Lu and W. Zhang, *European Food Research and Technology*, 2023, **249**, 2067-2075.
6. S. Zheng, X. Yang, B. Zhang, S. Cheng, H. Han, Q. Jin, C. Wang and R. Xiao, *Food Chemistry*, 2021, **363**, 130400.
